# Supplementary material for: Halogen bonded associates of iodonium salts with 18-crown-6: does structural flexibility or structural rigidity of the σ-hole donor provide efficient substrate ligation?
Source: Royal Society of Chemistry journal article supplement (doi:10.1039/d4nj02105c), 2024-01-01
Supplement: d4nj02105c2.pdf [file d4nj02105c2.pdf]

## SUPPORTING INFORMATION

### Halogen Bonded Associates of Iodonium Salts with 18-Crown-6: Does Structural Flexibility or Structural Rigidity of the $\sigma$ -Hole Donor Provide Efficient Substrate Ligation?

Alexandra A. Sysoeva,<sup>1</sup> Alexander S. Novikov,<sup>1,2</sup> Mikhail V. Il'in,<sup>1</sup>  
and Dmitrii S. Bolotin<sup>1,\*</sup>

<sup>1</sup> Institute of Chemistry, Saint Petersburg State University, Universitetskaya Nab. 7/9,  
Saint Petersburg, 199034, Russian Federation

<sup>2</sup> Peoples' Friendship University of Russia (RUDN University), Miklukho-Maklaya Str.  
6, 117198 Moscow, Russian Federation

\* Corresponding author E-mail: d.s.bolotin@spbu.ru

#### Table of contents

|                                                                                |     |
|--------------------------------------------------------------------------------|-----|
| Titration data.....                                                            | S2  |
| Spectra of the iodonium salts.....                                             | S4  |
| Calculation data.....                                                          | S12 |
| Crystal data for $1^{\text{OTf}} \cdot 18\text{C}6 \cdot 1^{\text{OTf}}$ ..... | S13 |

## Titration data

**Table S1.** Titration data of dibenziodolium triflate in CD<sub>3</sub>CN.

| Equivalents of dibenziodolium triflate | $\delta$ , ppm | $\Delta\delta$ , ppm |
|----------------------------------------|----------------|----------------------|
| 0                                      | 3.539          | 0.000                |
| 0.25                                   | 3.540          | 0.001                |
| 1                                      | 3.546          | 0.006                |
| 3                                      | 3.553          | 0.014                |
| 5                                      | 3.561          | 0.022                |
| 10                                     | 3.582          | 0.043                |
| 20                                     | 3.608          | 0.069                |

**Table S2.** Titration data of diphenyliodonium triflate in CD<sub>3</sub>CN.

| Equivalents of diphenyliodonium triflate | $\delta$ , ppm | $\Delta\delta$ , ppm |
|------------------------------------------|----------------|----------------------|
| 0                                        | 3.539          | 0.000                |
| 0.25                                     | 3.539          | 0.000                |
| 0.5                                      | 3.539          | 0.000                |
| 1                                        | 3.538          | -0.002               |
| 2                                        | 3.538          | -0.001               |
| 2.5                                      | 3.536          | -0.004               |
| 2.75                                     | 3.539          | -0.001               |
| 3                                        | 3.535          | -0.004               |
| 3.25                                     | 3.538          | -0.002               |
| 3.5                                      | 3.537          | -0.002               |
| 4                                        | 3.539          | -0.001               |
| 5                                        | 3.537          | -0.002               |
| 10                                       | 3.541          | 0.001                |
| 15                                       | 3.549          | 0.010                |
| 20                                       | 3.556          | 0.017                |

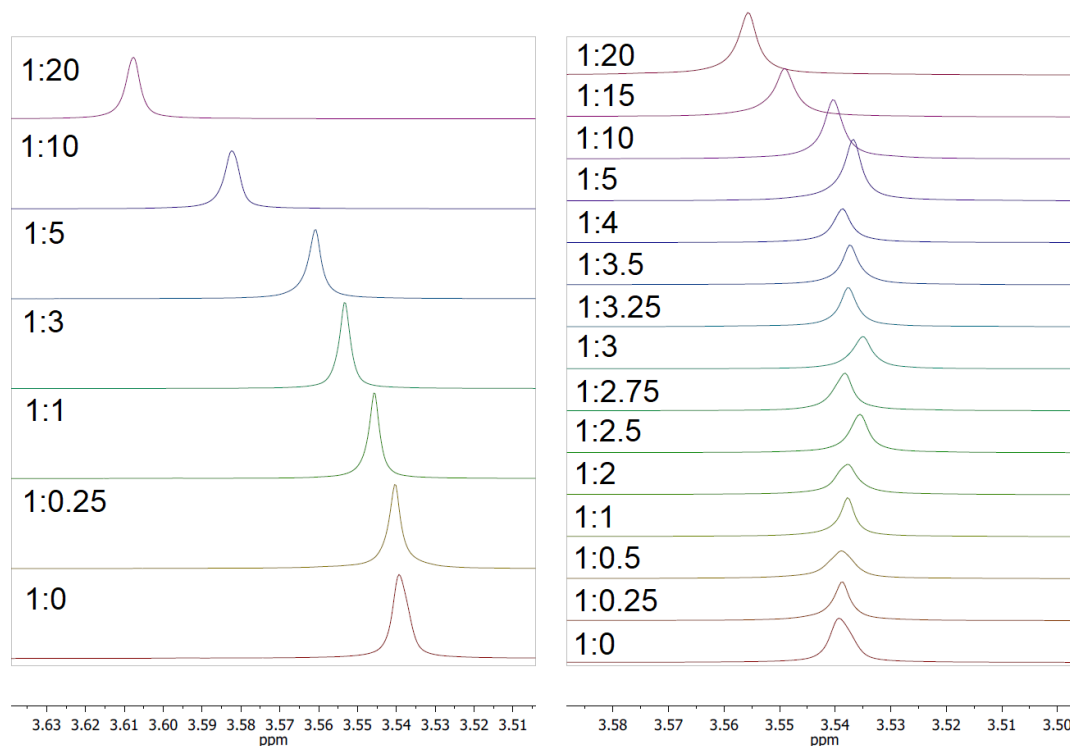

**Figure S1.** Stacked <sup>1</sup>H NMR spectra for the titration of 18-crown-6 with dibenziodolium triflate (left) or diphenyliodonium triflate (right) in CD<sub>3</sub>CN.

**Table S3.** Titration data of dibenziodolium triflate in CD<sub>3</sub>OD.

| Equivalents of dibenziodolium triflate | $\delta$ , ppm | $\Delta\delta$ , ppm |
|----------------------------------------|----------------|----------------------|
| 0                                      | 3.660          | 0.000                |
| 1                                      | 3.656          | -0.004               |
| 5                                      | 3.655          | -0.005               |
| 10                                     | 3.653          | -0.007               |
| 15                                     | 3.651          | -0.009               |
| 20                                     | 3.649          | -0.011               |
| 25                                     | 3.647          | -0.013               |
| 50                                     | 3.639          | -0.020               |

**Table S4.** Titration data of diphenyliodonium triflate in CD<sub>3</sub>OD.

| Equivalents of diphenyliodonium triflate | $\delta$ , ppm | $\Delta\delta$ , ppm |
|------------------------------------------|----------------|----------------------|
| 0                                        | 3.660          | 0.000                |
| 1                                        | 3.655          | -0.004               |
| 5                                        | 3.652          | -0.008               |
| 10                                       | 3.648          | -0.012               |
| 15                                       | 3.644          | -0.016               |
| 20                                       | 3.642          | -0.018               |
| 25                                       | 3.640          | -0.019               |
| 50                                       | 3.634          | -0.026               |

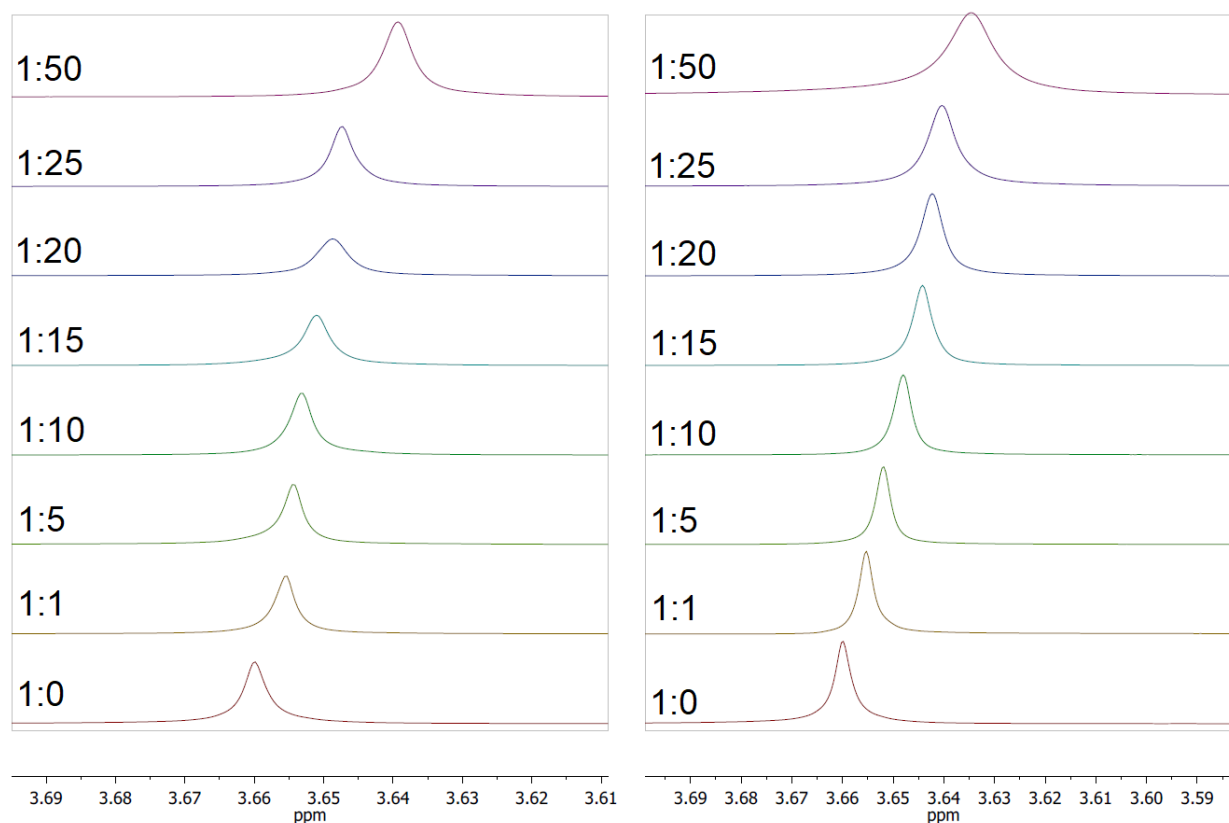**Figure S2.** Stacked <sup>1</sup>H NMR spectra titration of dibenziodolium triflate (left) and diphenyliodonium triflate (right) in CD<sub>3</sub>OD.

### Spectra of the iodonium salts

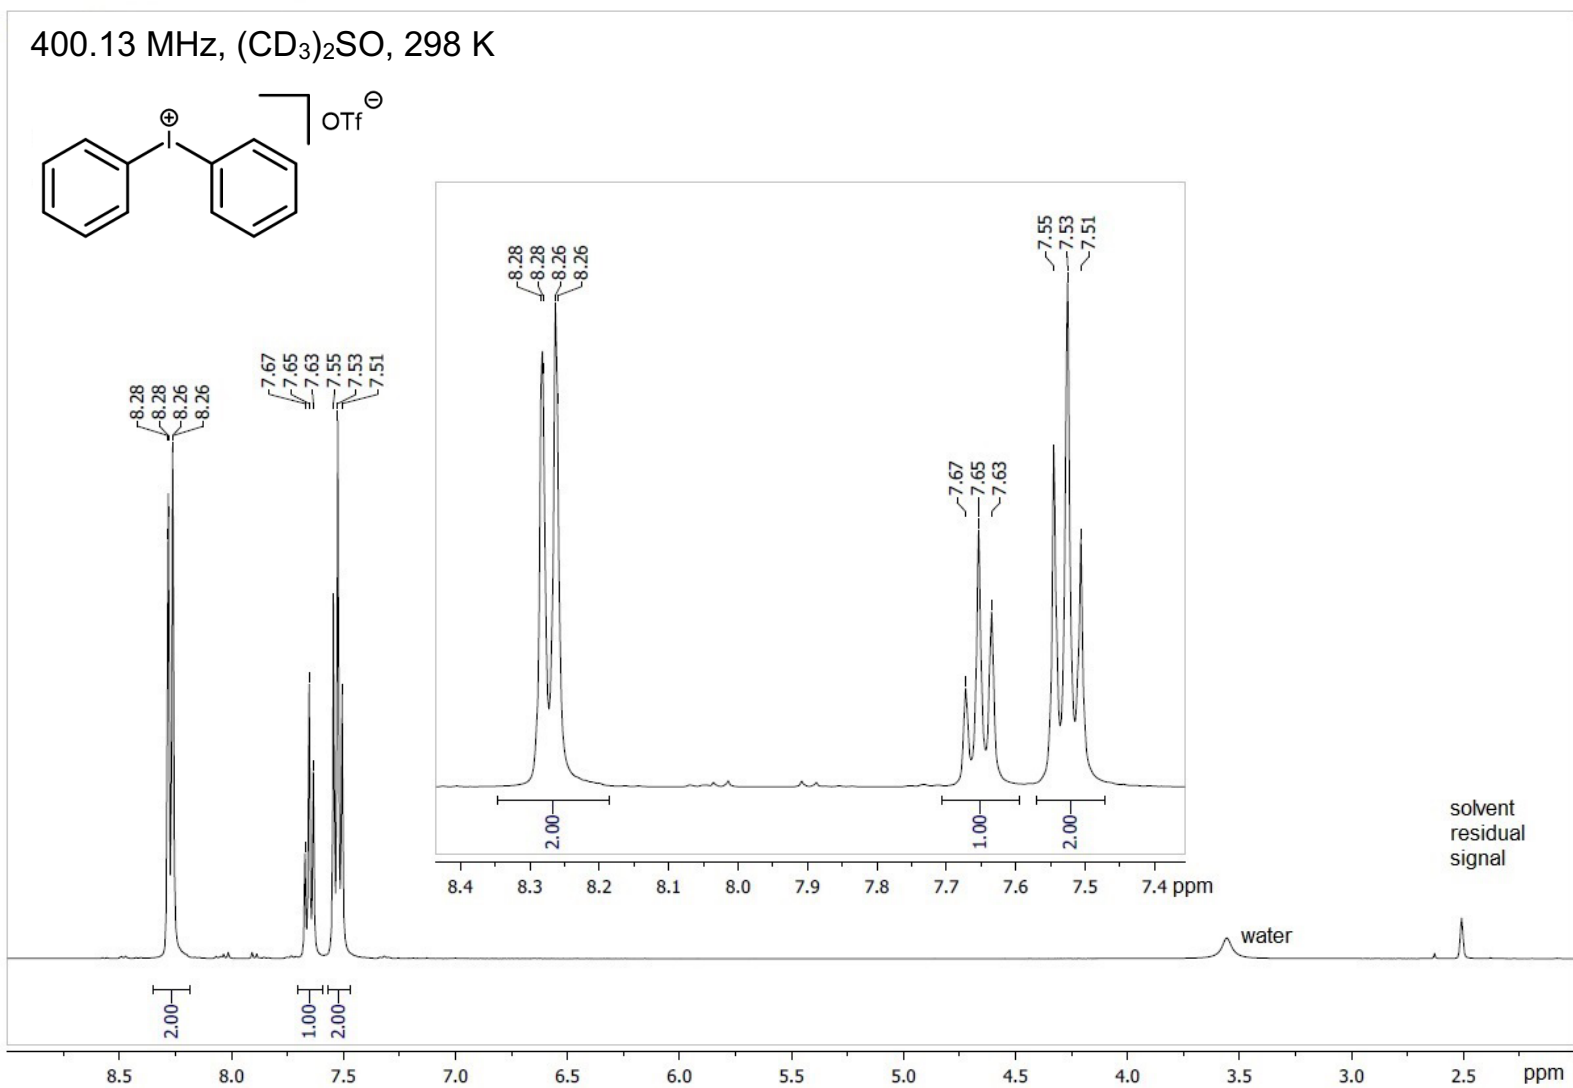

Figure S3. <sup>1</sup>H NMR spectrum of the **1**<sup>OTf</sup>.

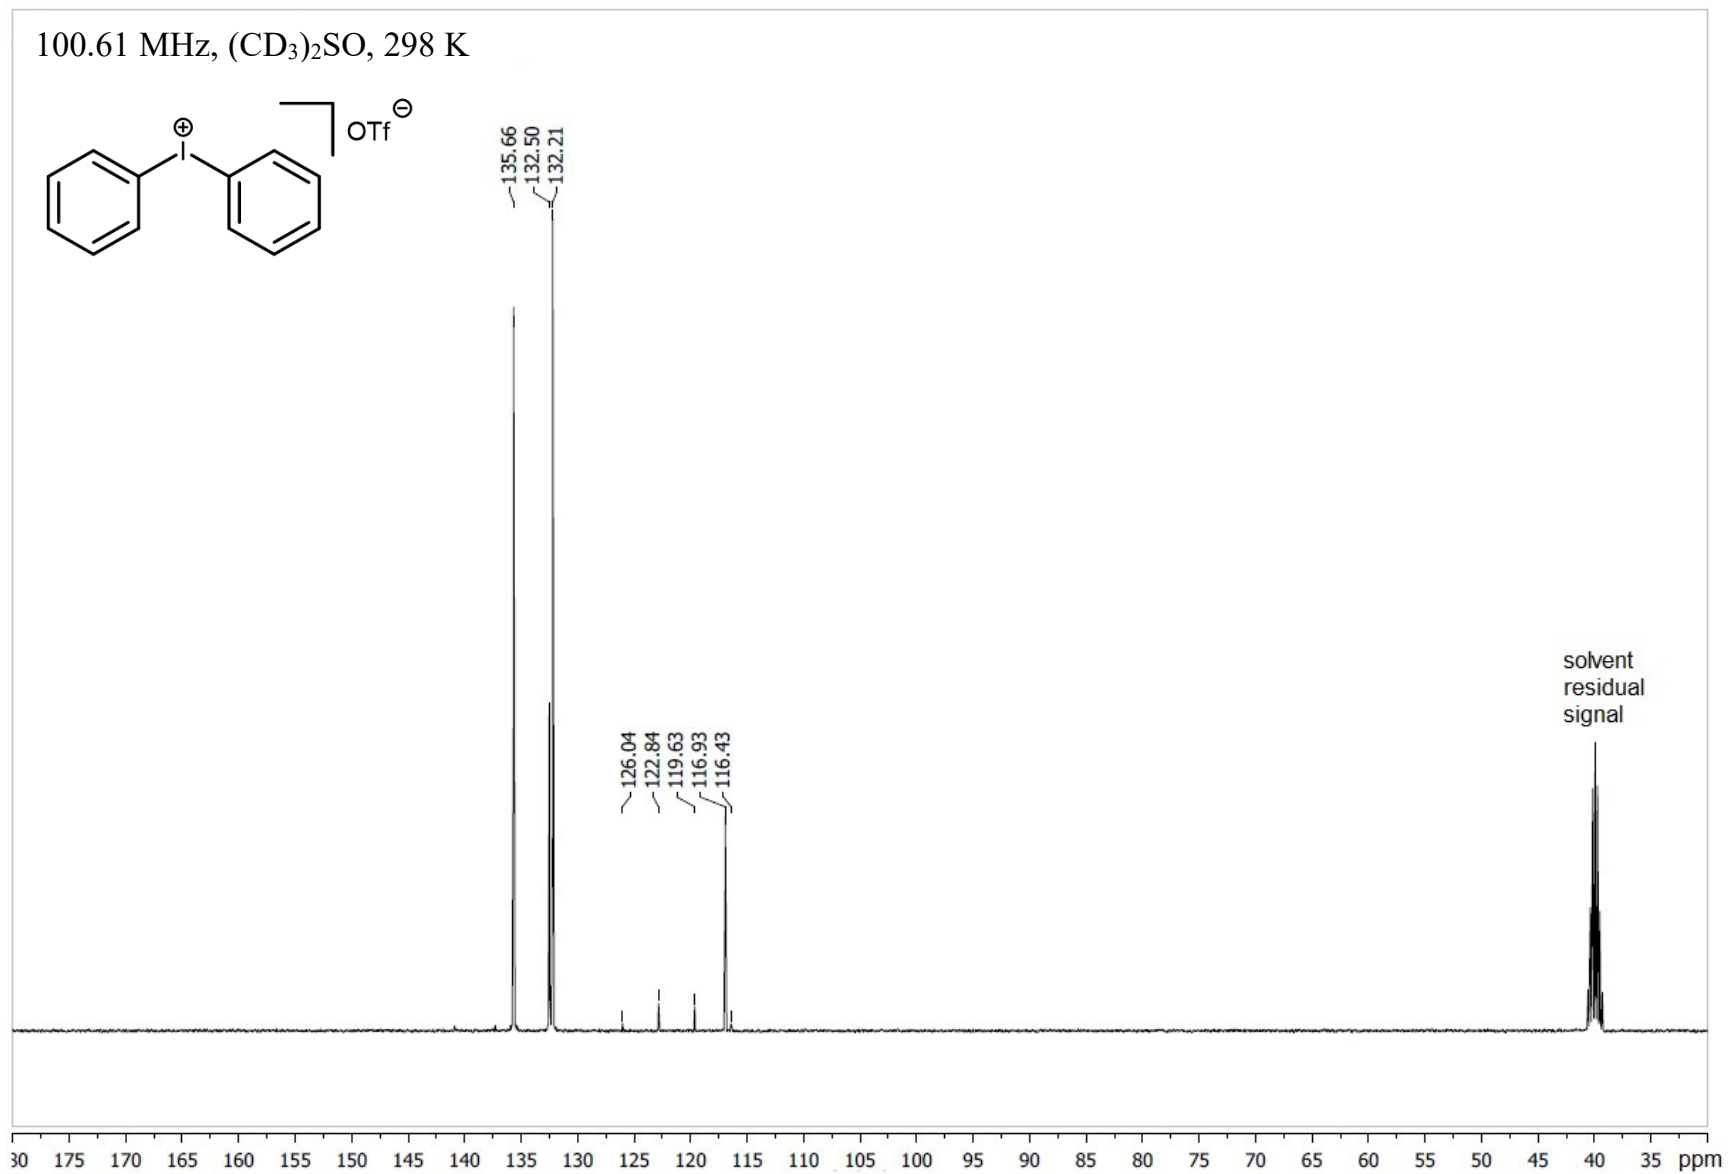

**Figure S4.** <sup>13</sup>C{<sup>1</sup>H} NMR spectrum of the **1**<sup>OTf</sup>.

100.61 MHz, (CD<sub>3</sub>)<sub>2</sub>SO, 298 K

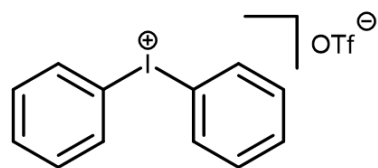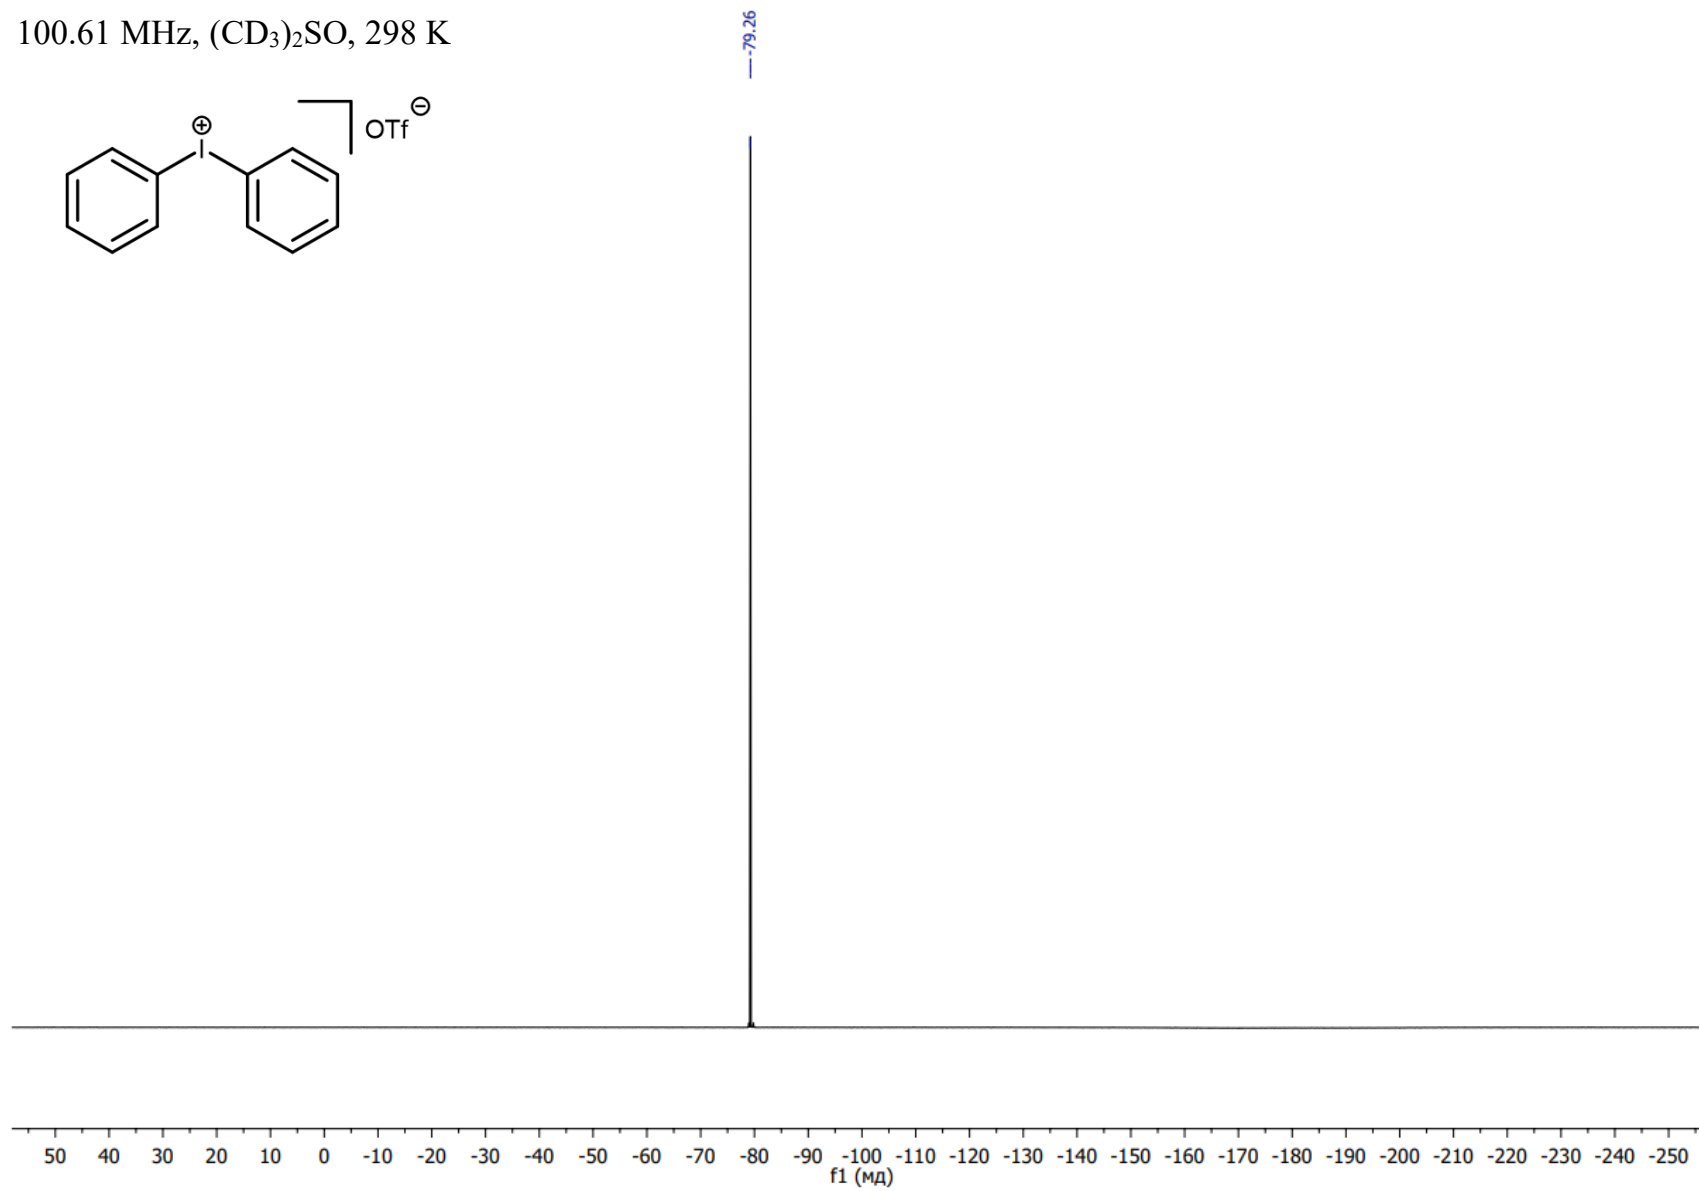

**Figure S5.** <sup>19</sup>F NMR spectrum of the **1**<sup>OTf</sup>.

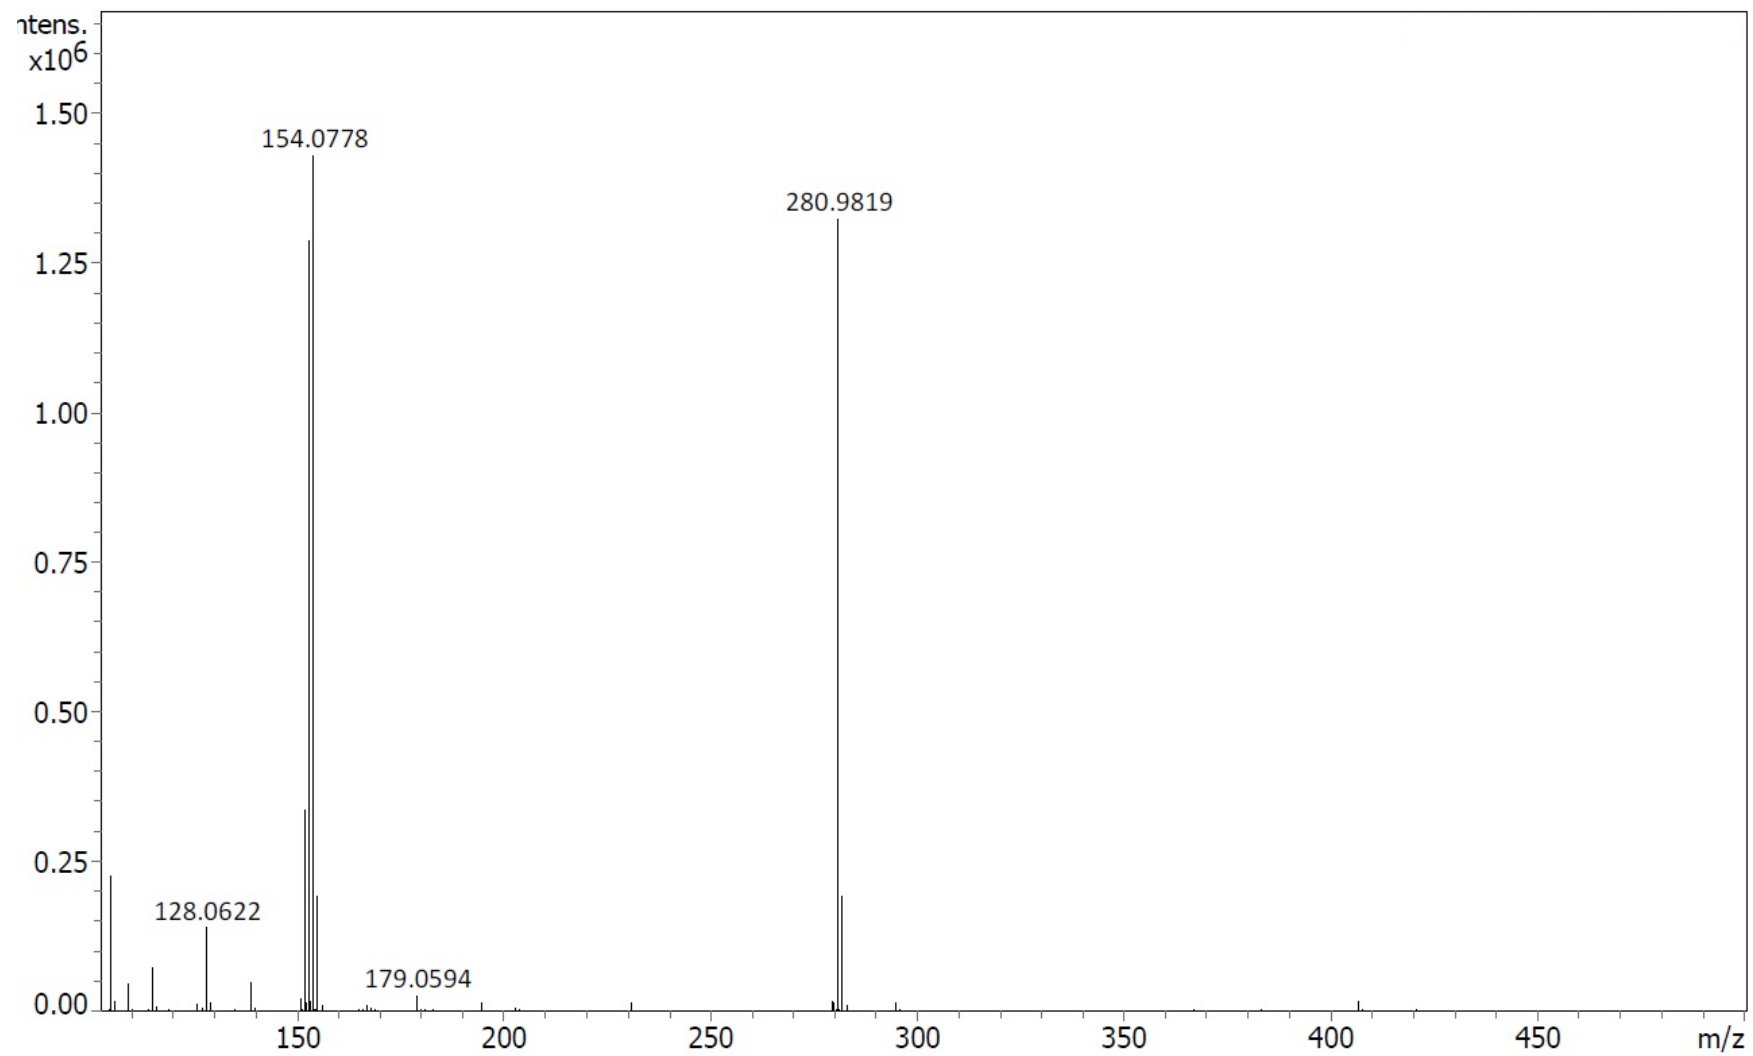

**Figure S6.** HRES<sup>+</sup>-MS spectrum of the **1<sup>OTf</sup>**.

400.13 MHz, (CD<sub>3</sub>)<sub>2</sub>SO, 298 K

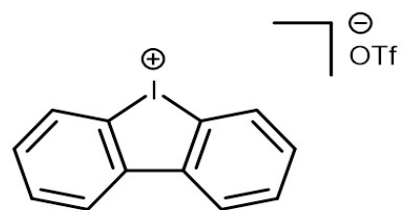

8.38  
8.36  
8.17  
8.14  
7.81  
7.79  
7.77  
7.69  
7.68  
7.67  
7.65

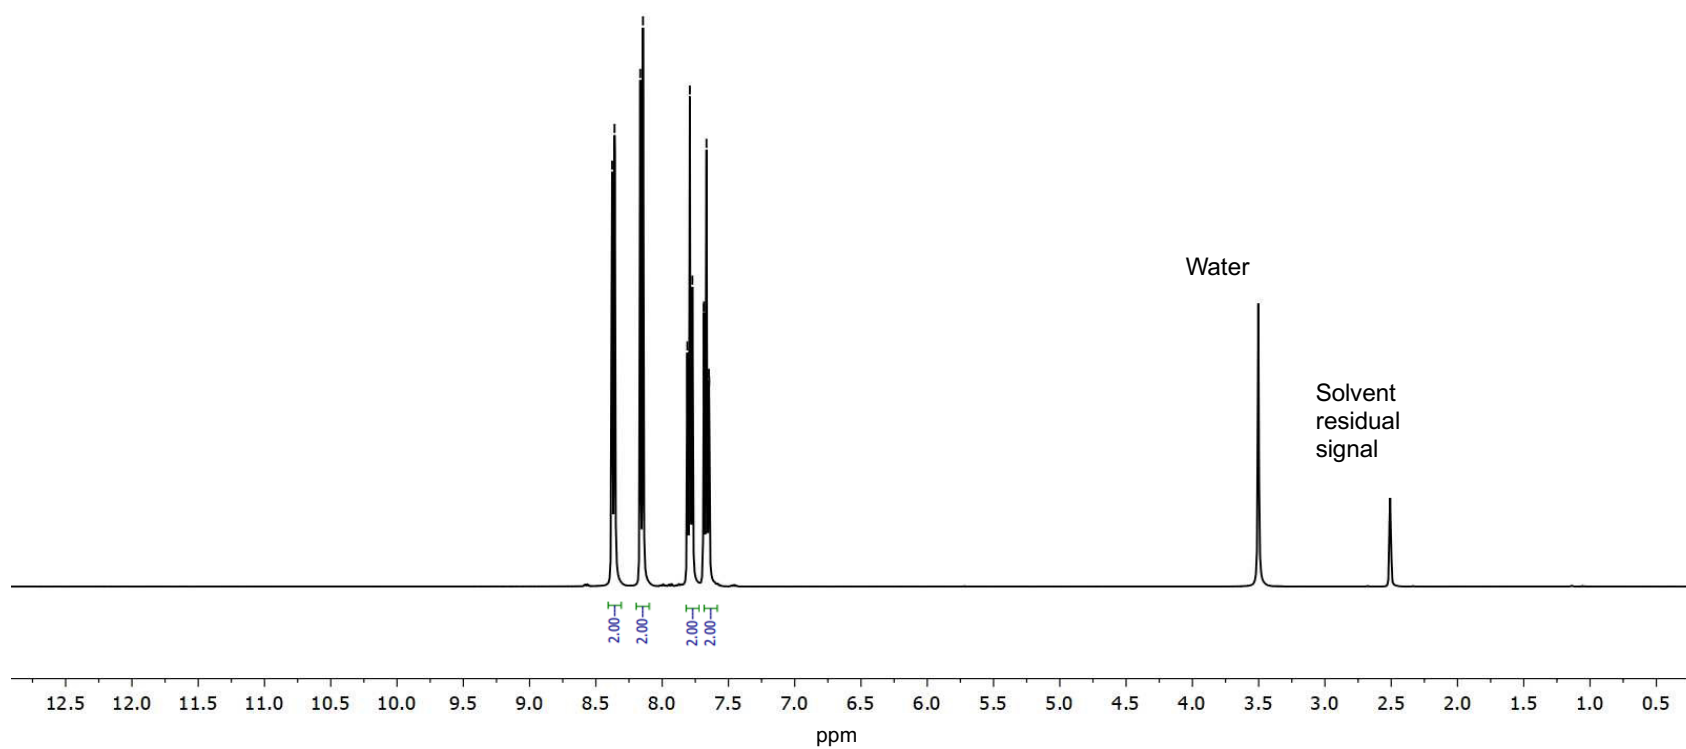

Figure S7. <sup>1</sup>H NMR spectrum of **2**<sup>OTf</sup>.



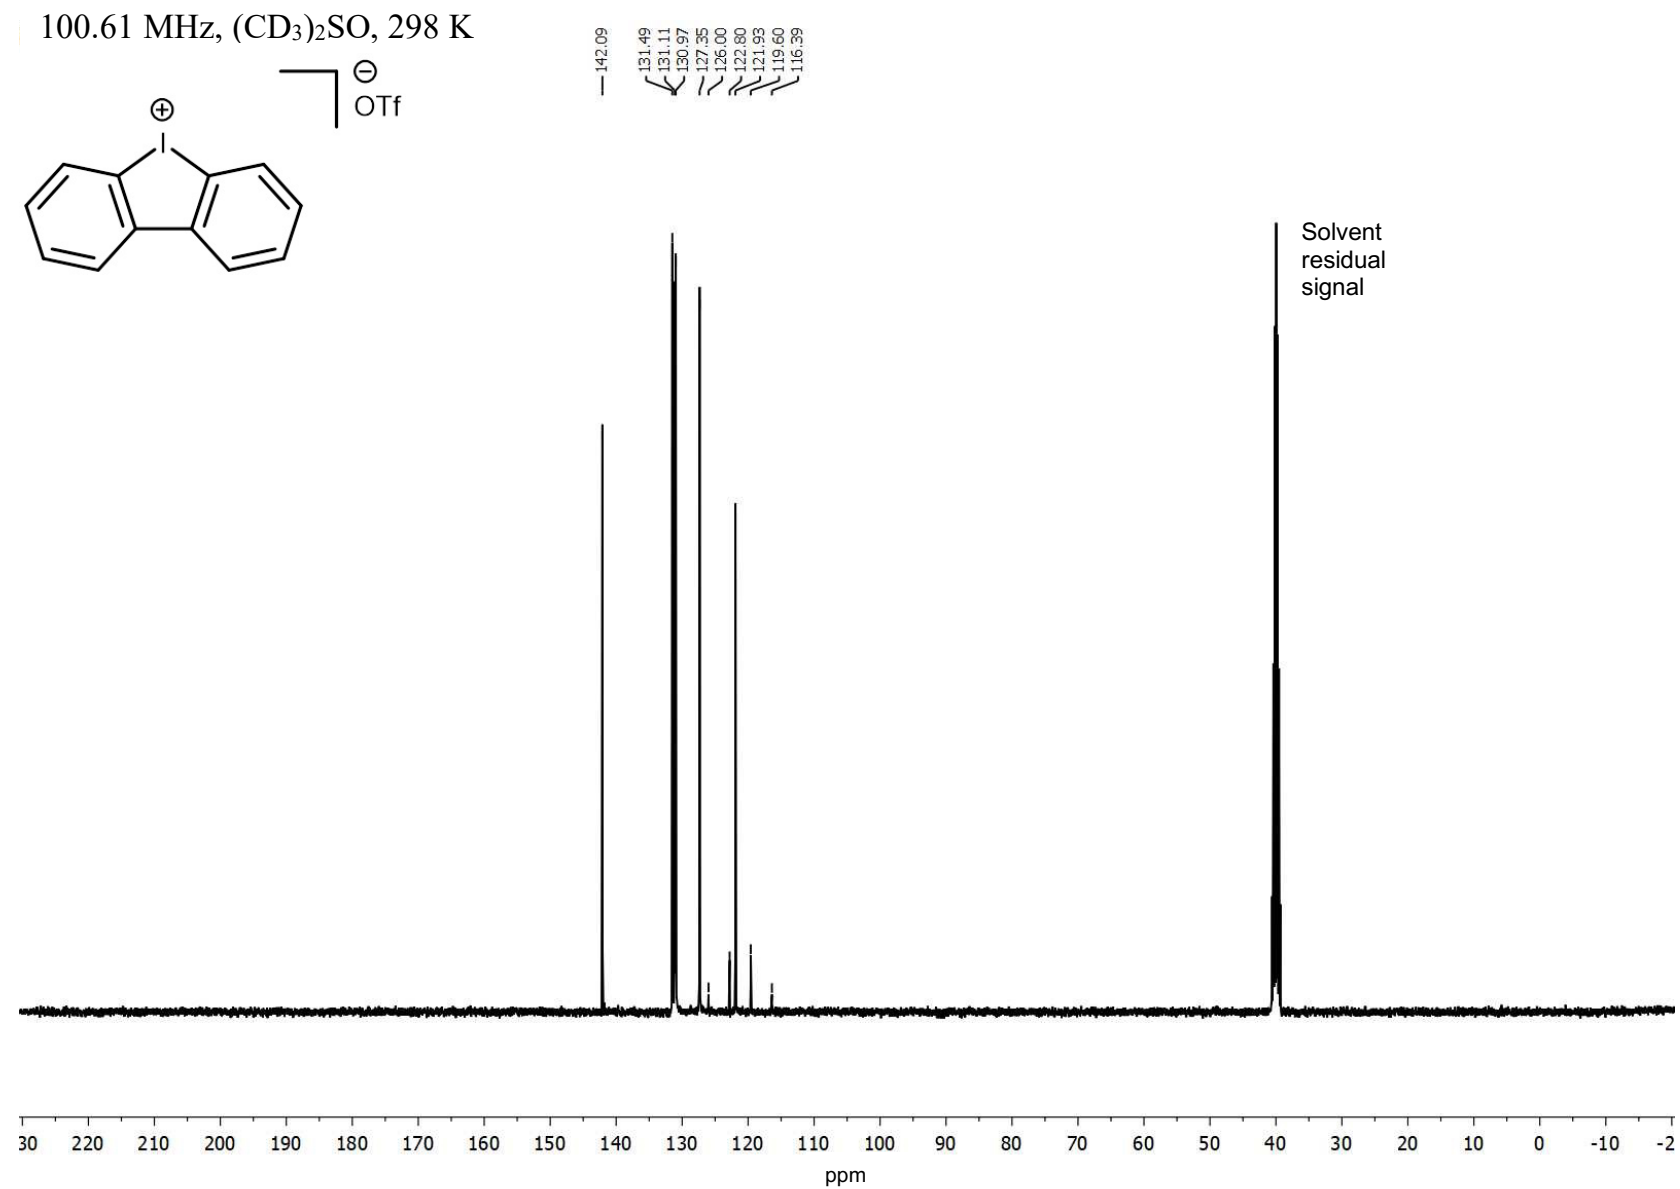

Figure S8. <sup>13</sup>C{<sup>1</sup>H} NMR spectrum of the **2**<sup>OTf</sup>.

S9

376.49 MHz, CD<sub>3</sub>CN, 298 K

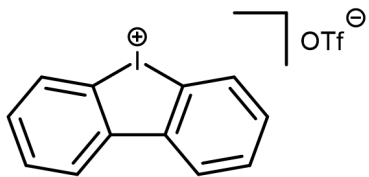

—79.25

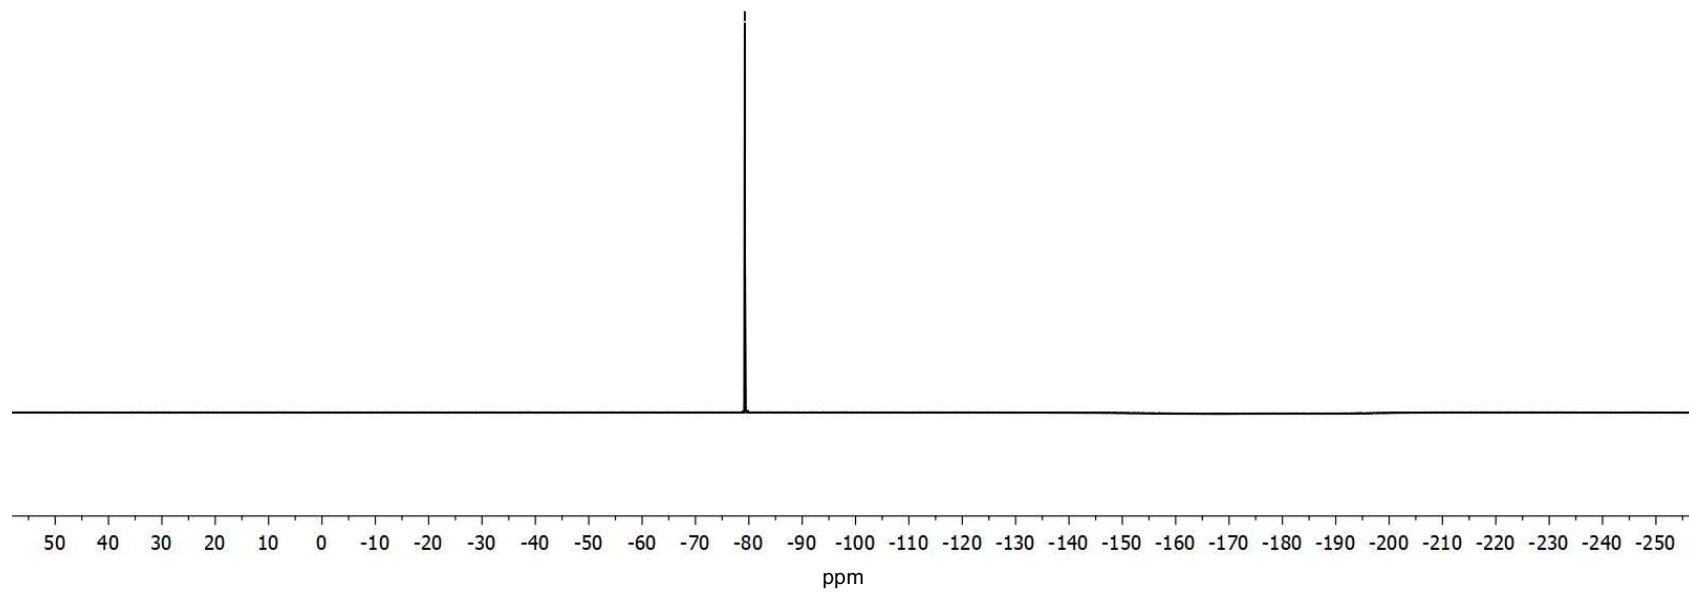

**Figure S9.** <sup>19</sup>F NMR spectrum of the 2<sup>OTf</sup>.

S10

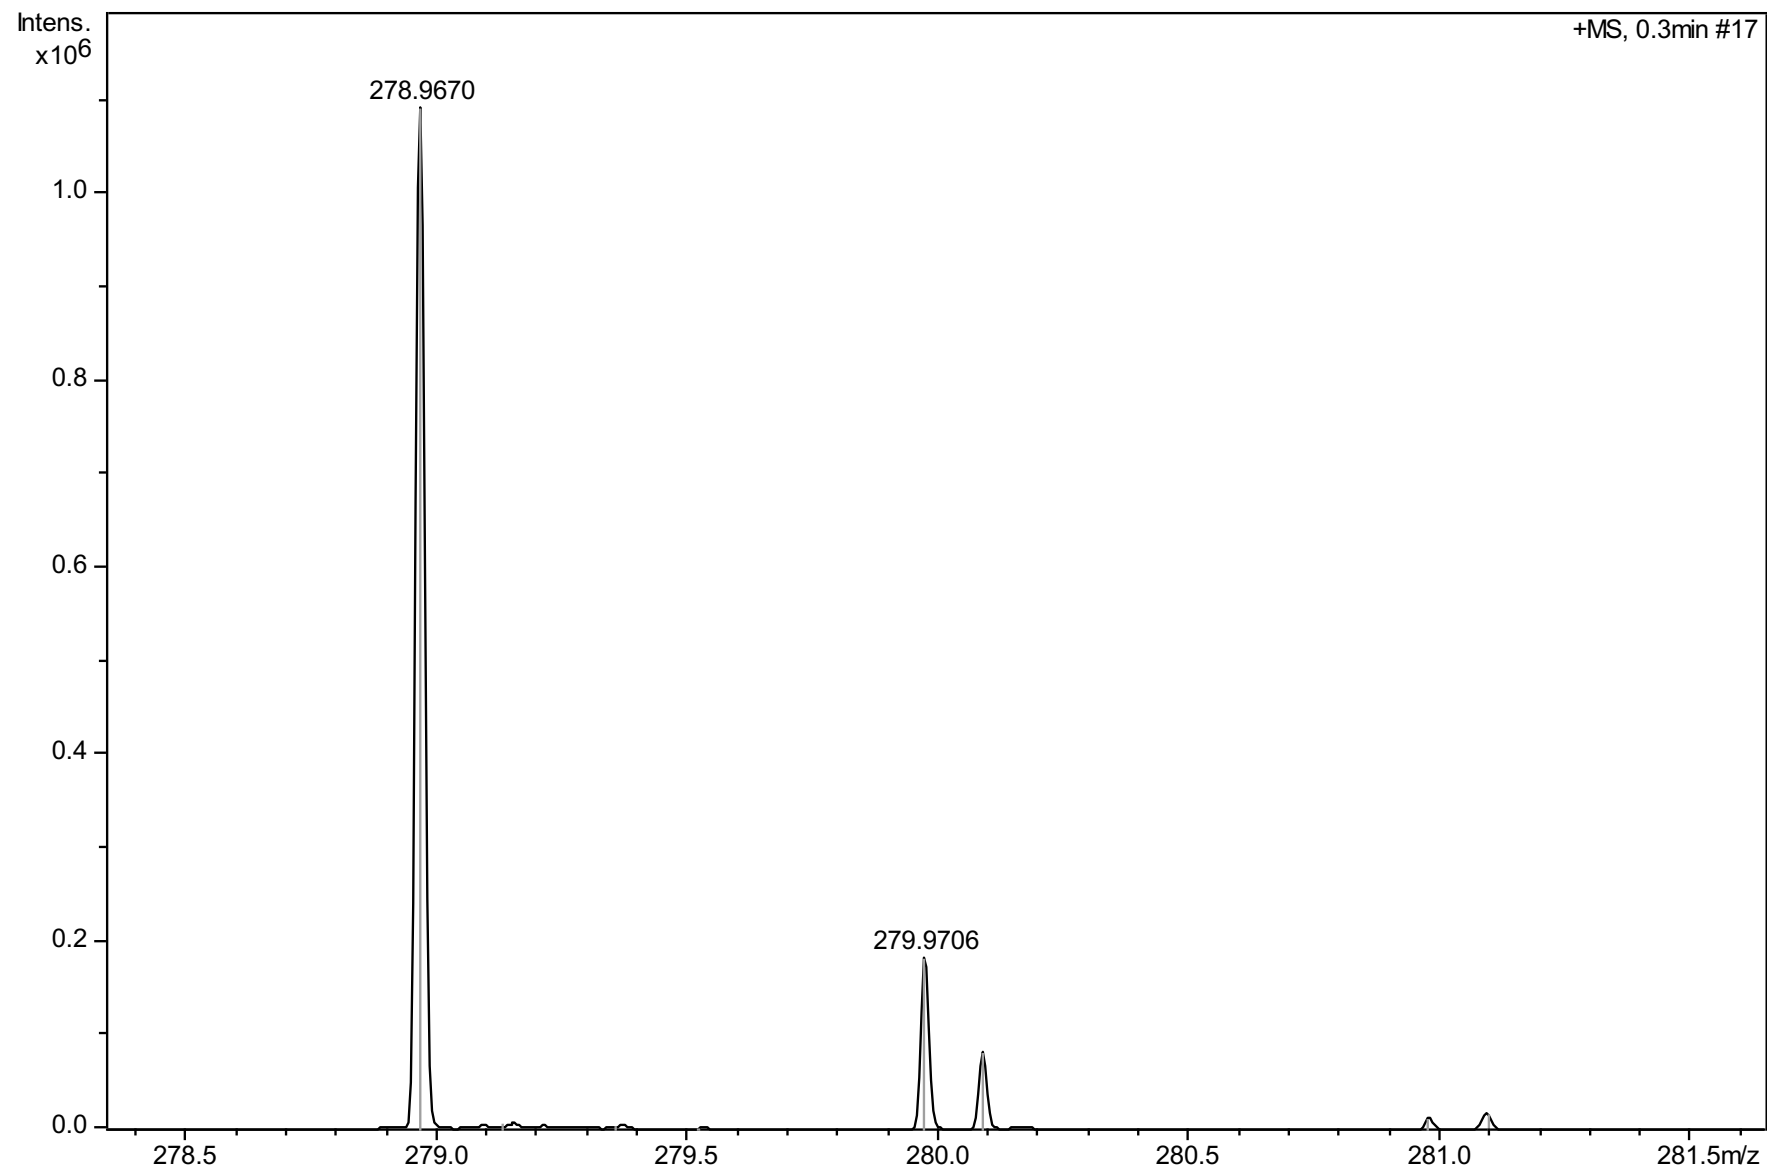

**Figure S10.** HRES<sup>+</sup>-MS spectrum of the **2<sup>OTf</sup>**.

S11

### Calculation data

**Table S5.** Calculated total electronic energies (E, in Hartree), enthalpies (H, in Hartree), Gibbs free energies (G, in Hartree), and entropies (S, cal/mol•K) for optimized equilibrium model structures.

| Model structure                         | E              | H            | G            | S       |
|-----------------------------------------|----------------|--------------|--------------|---------|
| Methanol                                |                |              |              |         |
| <b>1<sup>+</sup></b>                    | -473.144237450 | -472.971681  | -473.019871  | 101.425 |
| <b>2<sup>+</sup></b>                    | -474.335753748 | -474.139961  | -474.192883  | 111.384 |
| 18C6                                    | -922.741190214 | -922.345039  | -922.414328  | 145.830 |
| <b>1<sup>+</sup>·18C6</b>               | -1395.91484689 | -1395.343345 | -1395.438290 | 199.828 |
| <b>1<sup>+</sup>·18C6·1<sup>+</sup></b> | -1869.08023905 | -1868.332622 | -1868.455242 | 258.076 |
| <b>2<sup>+</sup>·18C6</b>               | -1397.10930217 | -1396.514667 | -1396.612652 | 206.225 |
| <b>2<sup>+</sup>·18C6·2<sup>+</sup></b> | -1871.47395117 | -1870.680486 | -1870.807811 | 267.979 |
| Acetonitrile                            |                |              |              |         |
| <b>1<sup>+</sup></b>                    | -473.147252794 | -472.974707  | -473.023674  | 103.061 |
| <b>2<sup>+</sup></b>                    | -474.338820481 | -474.143126  | -474.195292  | 109.793 |
| 18C6                                    | -922.728721993 | -922.334731  | -922.403613  | 144.974 |
| <b>1<sup>+</sup>·18C6</b>               | -1395.90566093 | -1395.334750 | -1395.429152 | 198.684 |
| <b>1<sup>+</sup>·18C6·1<sup>+</sup></b> | -1869.07473186 | -1868.326635 | -1868.443322 | 245.588 |
| <b>2<sup>+</sup>·18C6</b>               | -1397.10104862 | -1396.507161 | -1396.604943 | 205.799 |
| <b>2<sup>+</sup>·18C6·2<sup>+</sup></b> | -1871.46746102 | -1870.674637 | -1870.801292 | 266.567 |

**Table S6.** Crystal data for **1<sup>OTf</sup>·18C6·1<sup>OTf</sup>**.

|                                             |                                                                                              |
|---------------------------------------------|----------------------------------------------------------------------------------------------|
| Identification code                         | <b>1<sup>OTf</sup>·18C6·1<sup>OTf</sup></b>                                                  |
| Empirical formula                           | C <sub>38</sub> H <sub>44</sub> F <sub>6</sub> I <sub>2</sub> O <sub>12</sub> S <sub>2</sub> |
| Formula weight                              | 1124.65                                                                                      |
| Temperature/K                               | 100(2)                                                                                       |
| Crystal system                              | triclinic                                                                                    |
| Space group                                 | P-1                                                                                          |
| a/Å                                         | 9.5421(2)                                                                                    |
| b/Å                                         | 9.8378(2)                                                                                    |
| c/Å                                         | 12.7043(2)                                                                                   |
| α/°                                         | 89.682(2)                                                                                    |
| β/°                                         | 88.449(2)                                                                                    |
| γ/°                                         | 63.993(2)                                                                                    |
| Volume/Å <sup>3</sup>                       | 1071.41(4)                                                                                   |
| Z                                           | 1                                                                                            |
| ρ <sub>calc</sub> g/cm <sup>3</sup>         | 1.743                                                                                        |
| μ/mm <sup>-1</sup>                          | 13.199                                                                                       |
| F(000)                                      | 560                                                                                          |
| Crystal size/mm <sup>3</sup>                | 0.07 × 0.05 × 0.03                                                                           |
| Radiation                                   | Cu Kα (λ = 1.54184)                                                                          |
| 2θ range for data                           | 6.96 to 124.998                                                                              |
| Index ranges                                | -10 ≤ h ≤ 10, -11 ≤ k ≤ 11, -                                                                |
| Reflections collected                       | 11991                                                                                        |
| Independent reflections                     | 3403 [R <sub>int</sub> = 0.0714, R <sub>sigma</sub> =                                        |
| Data/restraints/parameters                  | 3403/0/265                                                                                   |
| Goodness-of-fit on F <sup>2</sup>           | 1.083                                                                                        |
| Final R indexes [I ≥ 2σ (I)]                | R <sub>1</sub> = 0.0533, wR <sub>2</sub> = 0.1390                                            |
| Final R indexes [all data]                  | R <sub>1</sub> = 0.0548, wR <sub>2</sub> = 0.1404                                            |
| Largest diff. peak/hole / e·Å <sup>-3</sup> | 3.15/-1.41                                                                                   |
| CSD code                                    | 2361448                                                                                      |
